# Supplementary material
Source: publisher figshare collection journal article supplement (https://acs.figshare.com/ndownloader/files/18005990)
Supplement: Supplementary file 1 [file 18005990]

---

## **Supporting Information**

### **Enhanced enzymatic hydrolysis of corncob by synthesized enzyme-mimetic magnetic solid acid pretreatment in an aqueous phase**

Qing Xu<sup>1,3</sup>, Wei Yang<sup>1,2,3</sup>, Guifeng Liu<sup>2</sup>, Cuiyi Liang<sup>2</sup>, Si Lu<sup>2</sup>, Zhiqiang Qi<sup>2</sup>, Jinke Hu<sup>2</sup>, Qiong Wang<sup>2\*</sup>, Wei Qi<sup>2\*</sup>

<sup>1</sup>Shenzhen Institute of Guangdong Ocean University, Shenzhen, 518108, China;

<sup>2</sup>Guangzhou Institute of Energy Conversion, Chinese Academy of Sciences, CAS Key Laboratory of Renewable Energy, Guangdong Key Laboratory of New and Renewable Energy Research and Development; Guangzhou, 510640, China;

<sup>3</sup>School of Mechanical and Power Engineering, Guangdong Ocean University, Zhanjiang, 524000, China.

#### **Corresponding Author:**

Wei Qi, qiwei@ms.giec.ac.cn.

Qiong Wang, wangqiong@ms.giec.ac.cn

---

**List:**

**Table S1.** Ion concentrations of  $\text{Fe}^{3+}$  and  $\text{Cl}^-$  in pretreatment hydrolysate during the catalyst cycles

**Table S2.** Total acid amount in different usage cycles

**Figure S1.** XRD patterns of the natural and pretreated corncob.

**Figure S2.** SEM images of natural and pretreated corncob: (a) Natural corncob, (b) Corncob of pretreated by C350-Cl.

---

**Table S1.** Ion concentrations of  $\text{Fe}^{3+}$  and  $\text{Cl}^-$  in pretreatment hydrolysate during the catalyst cycles

| Used cycle                    | 1 <sup>st</sup> | 2 <sup>nd</sup> | 3 <sup>rd</sup> | 4 <sup>th</sup> | 5 <sup>th</sup> | C350 | No cat |
|-------------------------------|-----------------|-----------------|-----------------|-----------------|-----------------|------|--------|
| $\text{Fe}^{3+}(\text{mg/L})$ | 440.5           | 21.69           | 23.52           | 18.36           | 17.17           | 0    | 0      |
| $\text{Cl}^-(\text{mg/L})$    | 1077.6          | 121.35          | 75.09           | 92.98           | 84.46           | 0    | 0      |

---

C350: Pretreatment of corncob by C350 as the catalyst;

No cat: Pretreatment of corncob without any catalyst (i.e., liquid hot water).

Pretreatment conditions: 150 °C, 2 h, 2 g of C350-Cl, 2 g of corncob and 50 mL of deionized water.

---

---

**Table S2.** Total acid amount in different usage cycles

| Usage count                                             | 1 <sup>st</sup> | 2 <sup>nd</sup> | 5 <sup>th</sup> |
|---------------------------------------------------------|-----------------|-----------------|-----------------|
| Total acid amount(mmol H <sup>+</sup> g <sup>-1</sup> ) | 0.159           | 0.156           | 0.153           |

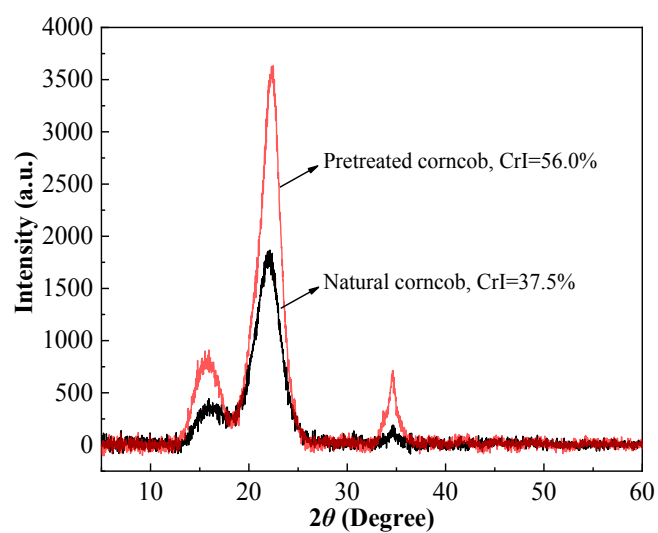

**Figure S1.** XRD patterns of the natural and pretreated corn cob.

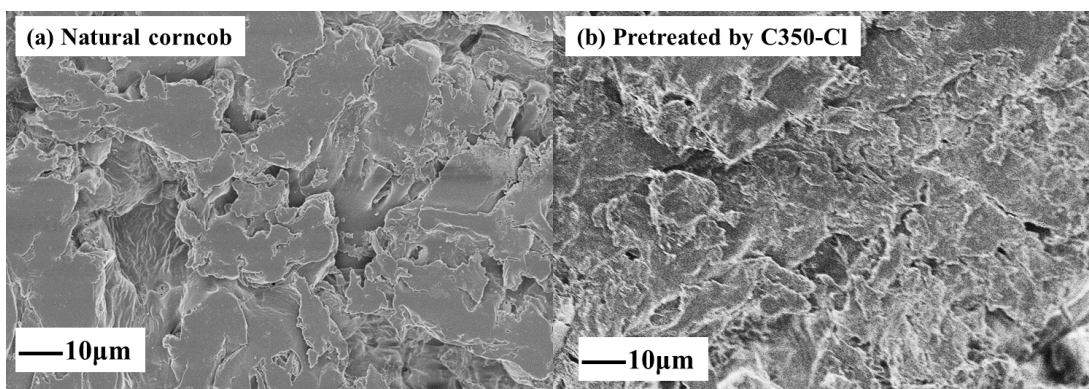

**Figure S2.** SEM images of natural and pretreated corncob: (a) Natural corncob, (b)  
Corncob of pretreated by C350-Cl.
